# Supplementary material for: Autocrine TGF-β-positive feedback in profibrotic AT2-lineage cells plays a crucial role in non-inflammatory lung fibrogenesis
Source: PubMed Central journal article supplement (PMC10471635; doi:10.1038/s41467-023-40617-y), 2023-08-31
Supplement: 41467_2023_40617_MOESM3_ESM.pdf [file 41467_2023_40617_MOESM3_ESM.pdf]

## **Description of Additional Supplementary Files**

### **Supplementary Data Legends**

**Supplementary Data 1:** Major materials used in this study

**Supplementary Data 2:** Upregulated genes in bleomycin-treated alveolar organoids evaluated by RNA-seq.

**Supplementary Data 3:** Primer sequences used in this study

**Supplementary Data 4:** Peak-matched genes in ChIP-seq and commonly upregulated genes even in RNA-seq for bleomycin-treated alveolar organoids (BLM-AO)

### **Supplementary Movie Legends**

**Supplementary Movie 1:** Live imaging for co-culture of control alveolar organoids (AOs) with primary fibroblasts isolated from Acta2-DsRed mice. Imaging was performed every 1.5 h until 72 h. AOs in Matrigel are located in the left upper area.

**Supplementary Movie 2:** Live imaging for co-culture of bleomycin-treated AO with primary fibroblasts isolated from Acta2-DsRed mice. Imaging was performed every 1.5 h until 72 h. AOs in Matrigel are located in the left upper area.
